# Supplementary material for: Nanocarriers Based on Gold Nanoparticles for Epigallocatechin Gallate Delivery in Cancer Cells
Source: MDPI journal article supplement (doi:10.3390/pharmaceutics14030491), 2022-02-24
Supplement: s1 [file s1]

Supplementary

# Nanocarriers Based on Gold Nanoparticles for Epigallocatechin Gallate Delivery in Cancer Cells

Lídia Cunha, Sílvia Castro Coelho, Maria do Carmo Pereira and Manuel A. N. Coelho

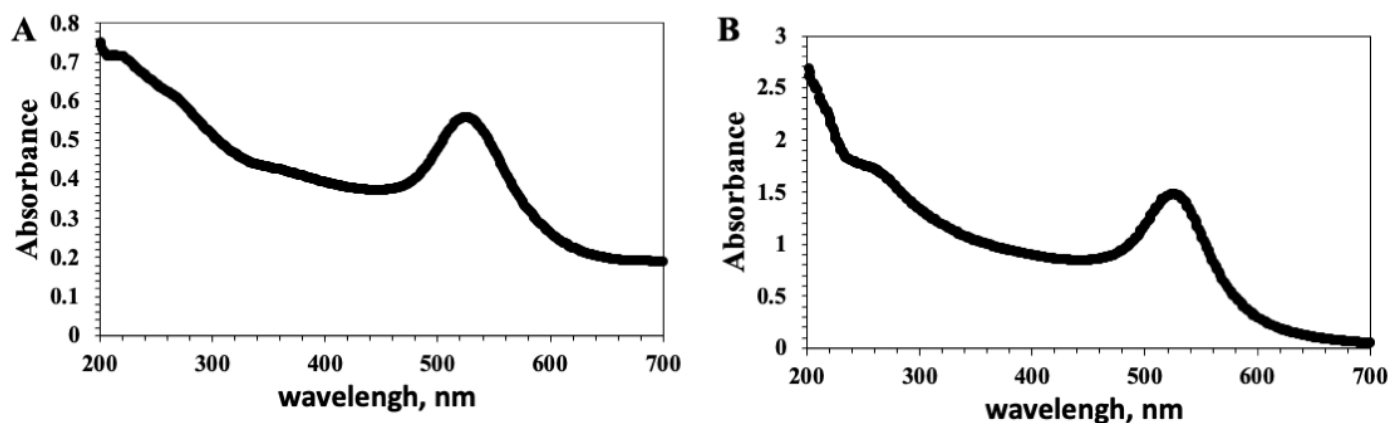

Figure S1. UV-vis absorption spectra of: A) EGCG-ChAuNPs and B) EGCG-CystAuNPs.

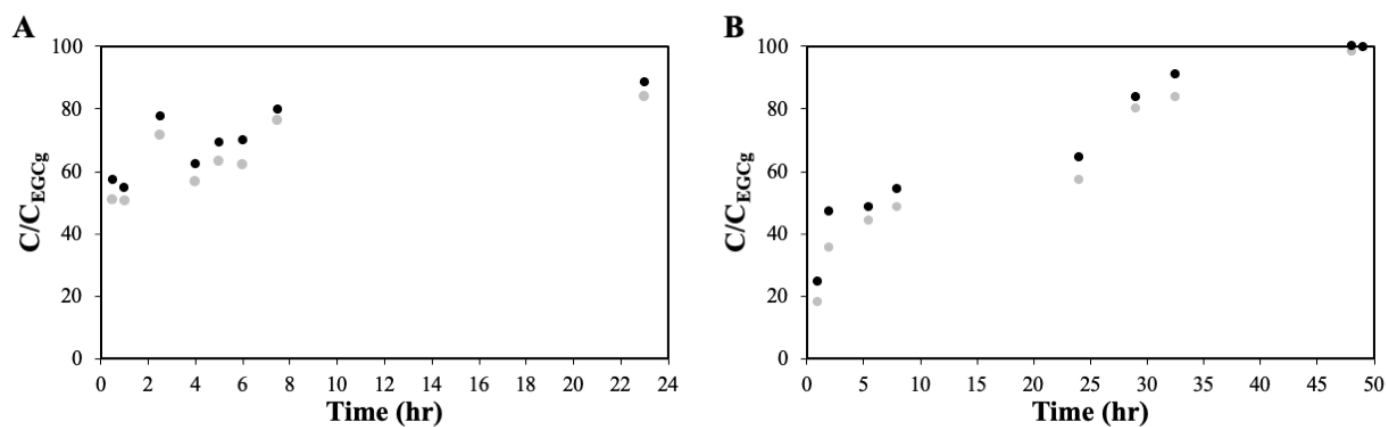

Figure S2. *In vitro* release spectra of A) EGCG-ChAuNPs and B) EGCG-CystAuNPs at pH 7.4 (in PBS 0.01M) at 37°C. • corresponds to the lowest release data; • corresponds to the highest release data.  $C_{EGCG}$  corresponds to the total amount of EGCG added.

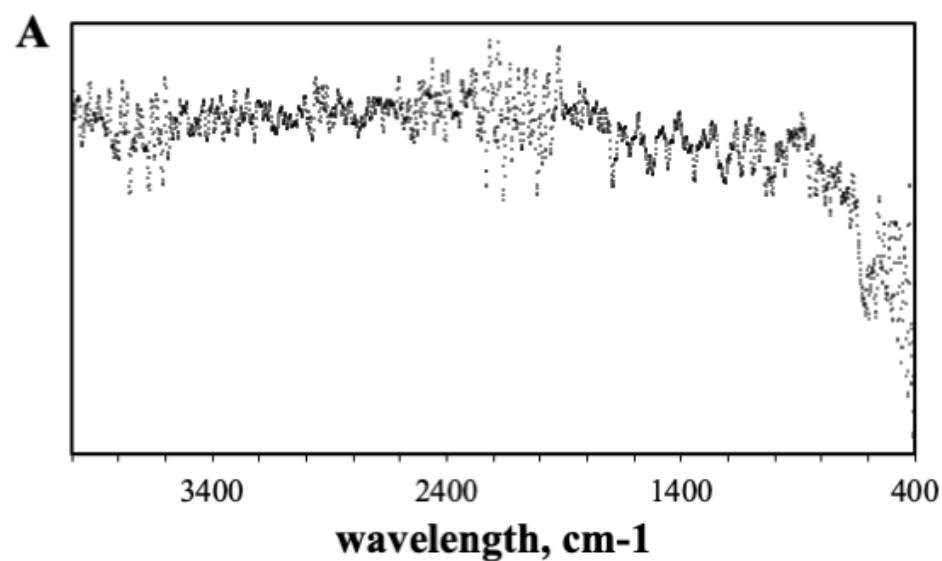

**Figure S3.** FTIR spectra of EGCG. The spectra were shifted for a better visualization.

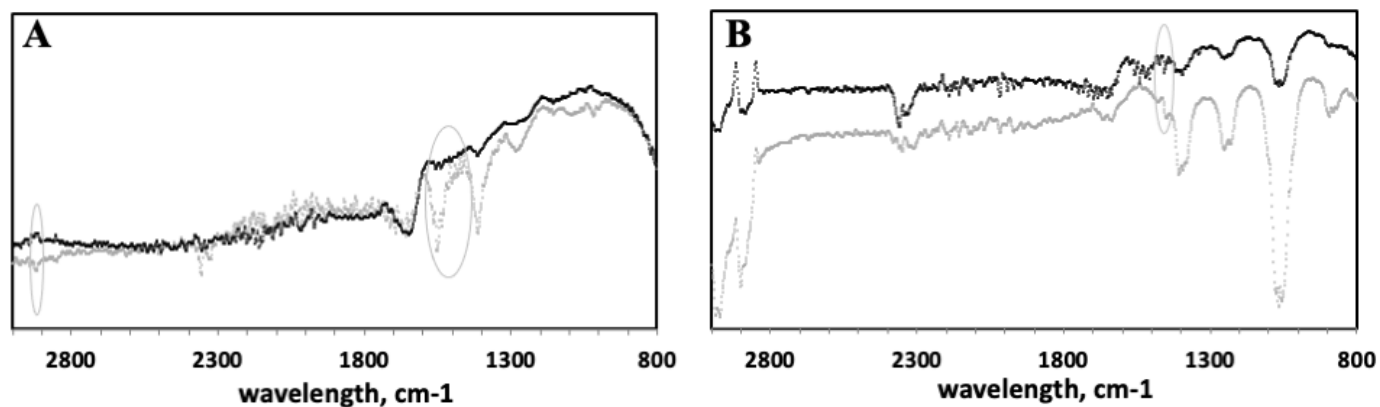

**Figure S4.** FTIR spectra of: A) EGCG-ChAuNPs and B) EGCG-CystAuNPs. The spectra were shifted for a better visualization. The final spectra correspond to the subtraction of deionized water FTIR spectrum to the nanoconjugates FTIR spectra.

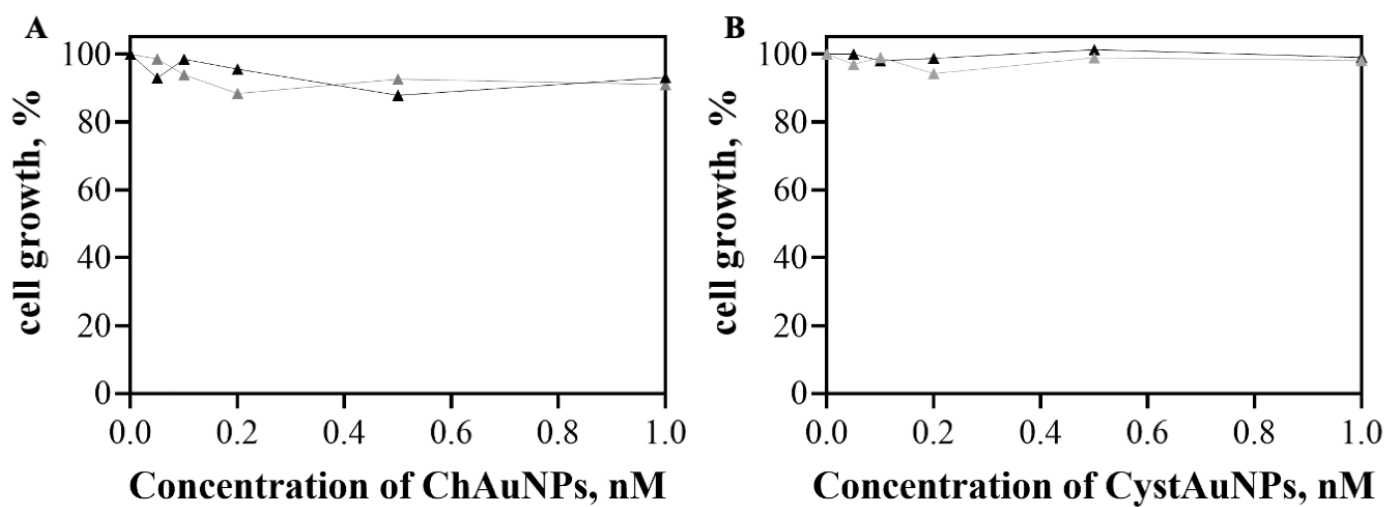

**Figure S5.** Effect of ChAuNPs (A) and CystAuNPs (B) on the cell growth of BxPC3 cells. -○- and -●- correspond to the lowest and highest cell growth values, respectively.

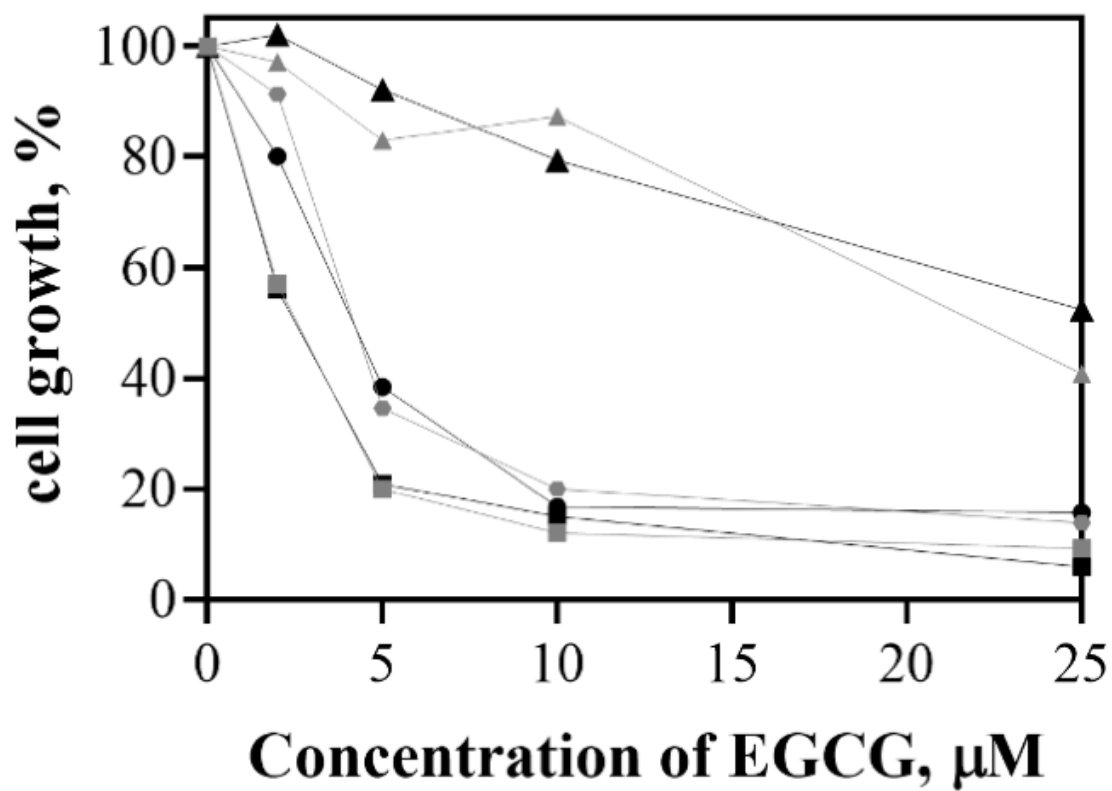

**Figure S6.** Effect of free EGCG ( $\blacktriangle$  and  $\blacktriangle$ ), EGCG-AuChNPs ( $\blacksquare$  and  $\blacksquare$ ) and EGCG-CysAuNPs ( $\bullet$  and  $\bullet$ ) on the growth of pancreatic cancer. The grey and black symbol correspond to the lowest and highest cell growth data, respectively.

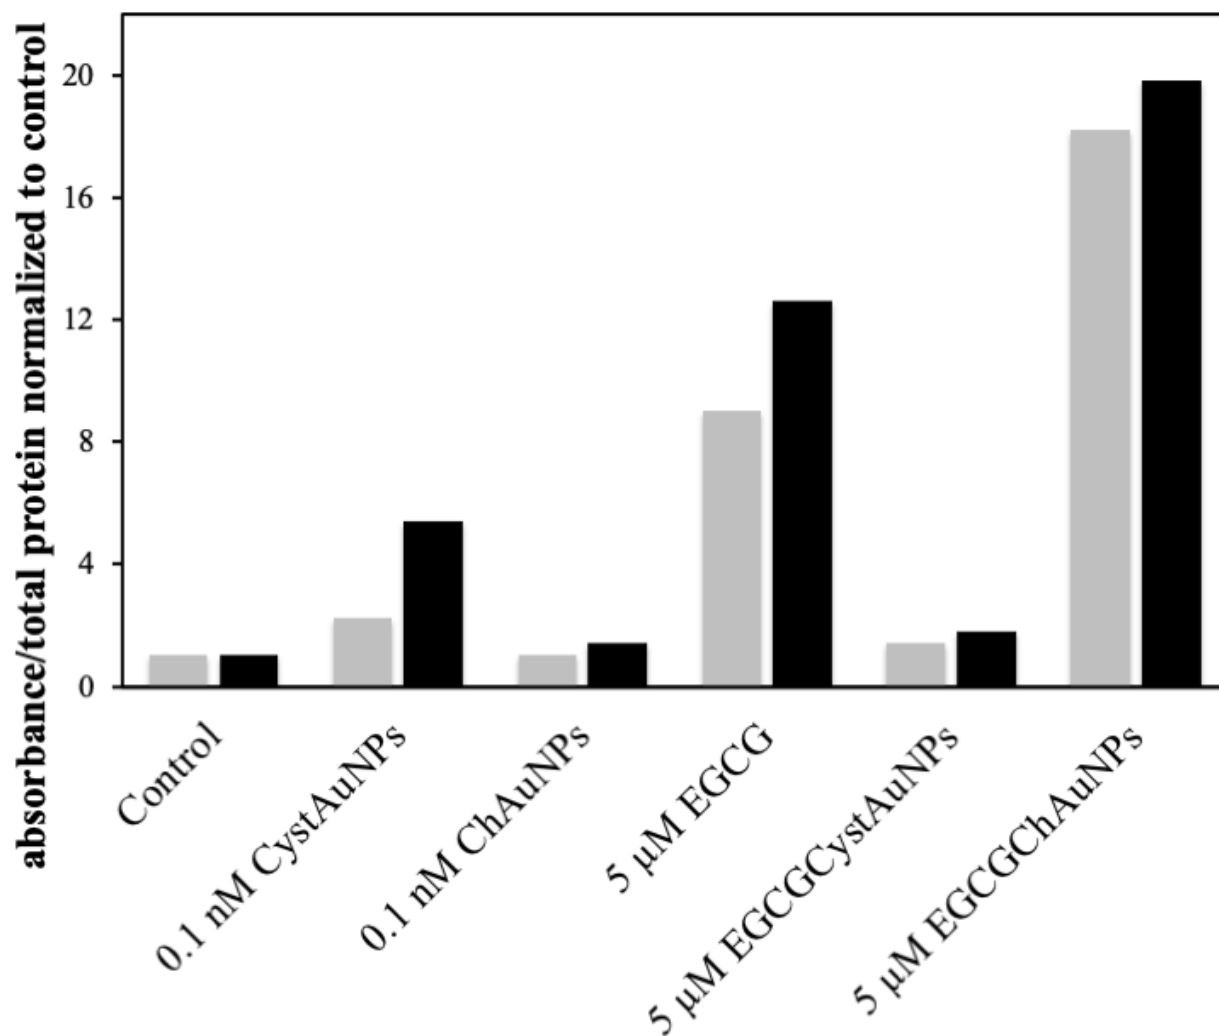

**Figure S7.** Activation of caspase-3 in pancreatic cancer cells exposed for 24 hours to free EGCG, EGCG-CystAuNPs, EGCG-ChAuNPs, CystAuNPs and ChAuNPs. Grey and black column correspond to the lowest and highest absorbance/total protein normalized to control, respectively.
